# Supplementary material
Source: publisher figshare collection journal article supplement (https://tandf.figshare.com/ndownloader/files/2365581)
Supplement: Supplementary file 1 [file 2365581]

*Supplementary material for Nielsen M. S. et al. A new method to validate thoracic CT-CT deformable image registration using auto-segmented 3D anatomical landmarks, Acta Oncologica, 2015; 54: 1515–1520.*

Supplementary Table I. Patient summary.

| Patient | Sex/age | Primary disease                    | Bulky tumor | CT_a [months] | CT_b [months] |
|---------|---------|------------------------------------|-------------|---------------|---------------|
| 1       | F/61    | Angioimmunoblastic T-cell lymphoma | None        | 3             | 10            |
| 2       | M/57    | Diffuse large B-cell lymphoma      | Jejunum     | 4             | 18            |
| 3       | F/52    | Angioimmunoblastic T-cell lymphoma | None        | 5             | 9             |
| 4       | M/71    | Diffuse large B-cell lymphoma      | Delteoideus | 3             | 5             |
| 5       | M/56    | Morbus Hodgkins lymphoma           | Kidney      | 5             | 10            |

Patient summary with sex, age at the date of reference CT, primary disease and existence/location of a bulky tumor. The time stamp at CT\_a & CT\_b indicates the elapsed time interval from the reference CT to the subsequent CT acquisition.
